# Supplementary material
Source: MDPI journal article supplement (https://www.mdpi.com/2073-4441/14/7/1106)
Supplement: s1 [file s1]

## Supplementary material

**Table S1.** Kolmogorov-Smirnov (K-S) test of BOD<sub>5</sub> for each WWTP in each year.

| WWTP | Year | Kolmogorov-Smirnov<br>Computed | Alfa | Table of<br>Kolmogorov-Smirnov | The Hypothesized log-<br>Normal should ... |
|------|------|--------------------------------|------|--------------------------------|--------------------------------------------|
| A    | 2018 | 0.190532                       | 0.01 | 0.205361                       | not be rejected                            |
| A    | 2015 | 0.122361                       | 0.01 | 0.22604                        | not be rejected                            |
| A    | 2017 | 0.168168                       | 0.01 | 0.205361                       | not be rejected                            |
| A    | 2016 | 0.091794                       | 0.01 | 0.200639                       | not be rejected                            |
| A    | 2019 | 0.104568                       | 0.01 | 0.199136                       | not be rejected                            |
| B    | 2017 | 0.192217                       | 0.01 | 0.223898                       | not be rejected                            |
| B    | 2018 | 0.223569                       | 0.01 | 0.223898                       | not be rejected                            |
| B    | 2015 | 0.241789                       | 0.01 | 0.223898                       | be rejected                                |
| B    | 2016 | 0.226988                       | 0.01 | 0.228246                       | not be rejected                            |
| B    | 2019 | 0.212162                       | 0.01 | 0.157578                       | be rejected                                |
| C    | 2017 | 0.101763                       | 0.01 | 0.163                          | not be rejected                            |
| C    | 2016 | 0.177437                       | 0.01 | 0.159835                       | be rejected                                |
| C    | 2015 | 0.139456                       | 0.01 | 0.160609                       | not be rejected                            |
| D    | 2018 | 0.162752                       | 0.01 | 0.173759                       | not be rejected                            |
| D    | 2019 | 0.173315                       | 0.01 | 0.26931                        | not be rejected                            |
| D    | 2015 | 0.130408                       | 0.01 | 0.228246                       | not be rejected                            |
| D    | 2017 | 0.164349                       | 0.01 | 0.22604                        | not be rejected                            |
| D    | 2016 | 0.140821                       | 0.01 | 0.22604                        | not be rejected                            |
| E    | 2017 | 0.135126                       | 0.01 | 0.178916                       | not be rejected                            |
| E    | 2018 | 0.152746                       | 0.01 | 0.169939                       | not be rejected                            |
| E    | 2015 | 0.168618                       | 0.01 | 0.178916                       | not be rejected                            |
| E    | 2019 | 0.128165                       | 0.01 | 0.169939                       | not be rejected                            |
| E    | 2016 | 0.135295                       | 0.01 | 0.184561                       | not be rejected                            |
| F    | 2018 | 0.168038                       | 0.01 | 0.142414                       | be rejected                                |
| F    | 2017 | 0.238203                       | 0.01 | 0.133985                       | be rejected                                |
| F    | 2016 | 0.195278                       | 0.01 | 0.160609                       | be rejected                                |
| F    | 2019 | 0.167197                       | 0.01 | 0.144639                       | be rejected                                |
| F    | 2015 | 0.096384                       | 0.01 | 0.138255                       | not be rejected                            |
| G    | 2018 | 0.166138                       | 0.01 | 0.186974                       | not be rejected                            |
| G    | 2019 | 0.153523                       | 0.01 | 0.202177                       | not be rejected                            |
| G    | 2016 | 0.178048                       | 0.01 | 0.190777                       | not be rejected                            |
| G    | 2017 | 0.076902                       | 0.01 | 0.197667                       | not be rejected                            |
| G    | 2015 | 0.095287                       | 0.01 | 0.194822                       | not be rejected                            |
| H    | 2017 | 0.328627                       | 0.01 | 0.200639                       | be rejected                                |
| H    | 2018 | 0.132596                       | 0.01 | 0.21012                        | not be rejected                            |
| H    | 2019 | 0.172906                       | 0.01 | 0.23076                        | not be rejected                            |
| I    | 2017 | 0.280169                       | 0.01 | 0.26931                        | be rejected                                |
| I    | 2019 | 0.145045                       | 0.01 | 0.37543                        | not be rejected                            |
| I    | 2018 | 0.310925                       | 0.01 | 0.26931                        | be rejected                                |
| I    | 2016 | 0.287367                       | 0.01 | 0.26931                        | be rejected                                |
| I    | 2015 | 0.269626                       | 0.01 | 0.26931                        | be rejected                                |
| J    | 2016 | 0.135076                       | 0.01 | 0.150054                       | not be rejected                            |
| J    | 2018 | 0.165348                       | 0.01 | 0.159072                       | be rejected                                |
| J    | 2015 | 0.175373                       | 0.01 | 0.165501                       | be rejected                                |

|   |      |          |      |          |                 |
|---|------|----------|------|----------|-----------------|
| J | 2017 | 0.140152 | 0.01 | 0.159835 | not be rejected |
| J | 2019 | 0.092099 | 0.01 | 0.164655 | not be rejected |
| K | 2018 | 0.120504 | 0.01 | 0.22425  | not be rejected |
| K | 2016 | 0.125901 | 0.01 | 0.22425  | not be rejected |
| K | 2019 | 0.152894 | 0.01 | 0.23076  | not be rejected |
| K | 2017 | 0.100173 | 0.01 | 0.22743  | not be rejected |
| K | 2015 | 0.313877 | 0.01 | 0.210432 | be rejected     |
| L | 2016 | 0.290082 | 0.01 | 0.21273  | be rejected     |
| L | 2015 | 0.17428  | 0.01 | 0.210432 | not be rejected |
| L | 2017 | 0.253958 | 0.01 | 0.21826  | be rejected     |
| L | 2019 | 0.134707 | 0.01 | 0.22119  | not be rejected |
| L | 2018 | 0.158877 | 0.01 | 0.22119  | not be rejected |
| M | 2019 | 0.092419 | 0.01 | 0.221815 | not be rejected |
| M | 2018 | 0.159135 | 0.01 | 0.200639 | not be rejected |
| M | 2016 | 0.155816 | 0.01 | 0.196229 | not be rejected |
| M | 2017 | 0.128296 | 0.01 | 0.217818 | not be rejected |
| M | 2015 | 0.224655 | 0.01 | 0.200639 | be rejected     |
| N | 2019 | 0.111487 | 0.01 | 0.22743  | not be rejected |
| N | 2018 | 0.135936 | 0.01 | 0.22425  | not be rejected |
| N | 2016 | 0.109677 | 0.01 | 0.22425  | not be rejected |
| N | 2017 | 0.147608 | 0.01 | 0.22743  | not be rejected |
| N | 2015 | 0.305387 | 0.01 | 0.210432 | be rejected     |
| O | 2018 | 0.157963 | 0.01 | 0.22119  | not be rejected |
| O | 2016 | 0.181215 | 0.01 | 0.22743  | not be rejected |
| O | 2019 | 0.170685 | 0.01 | 0.22425  | not be rejected |
| O | 2017 | 0.162508 | 0.01 | 0.22743  | not be rejected |
| O | 2015 | 0.236828 | 0.01 | 0.210432 | be rejected     |
| P | 2016 | 0.098952 | 0.01 | 0.22743  | not be rejected |
| P | 2018 | 0.148309 | 0.01 | 0.22425  | not be rejected |
| P | 2015 | 0.123197 | 0.01 | 0.212208 | not be rejected |
| P | 2019 | 0.140713 | 0.01 | 0.22425  | not be rejected |
| P | 2017 | 0.095834 | 0.01 | 0.22743  | not be rejected |

Table S2. Kolmogorov-Smirnov (K-S) test of COD for each WWTP in each year.

| WWTP | Year | Kolmogorov-Smirnov<br>computed | Alfa | Table of<br>Kolmogorov-Smirnov | The hypothesized log-<br>normal should ... |
|------|------|--------------------------------|------|--------------------------------|--------------------------------------------|
| A    | 2018 | 0.053458                       | 0.01 | 0.084173                       | not be rejected                            |
| A    | 2015 | 0.065745                       | 0.01 | 0.22604                        | not be rejected                            |
| A    | 2017 | 0.048907                       | 0.01 | 0.085553                       | not be rejected                            |
| A    | 2019 | 0.053703                       | 0.01 | 0.084854                       | not be rejected                            |
| A    | 2016 | 0.059598                       | 0.01 | 0.084285                       | not be rejected                            |
| B    | 2017 | 0.12954                        | 0.01 | 0.159072                       | not be rejected                            |
| B    | 2015 | 0.111999                       | 0.01 | 0.159072                       | not be rejected                            |
| B    | 2016 | 0.147463                       | 0.01 | 0.161394                       | not be rejected                            |
| B    | 2018 | 0.083457                       | 0.01 | 0.159072                       | not be rejected                            |
| B    | 2019 | 0.124449                       | 0.01 | 0.157578                       | not be rejected                            |
| C    | 2017 | 0.11179                        | 0.01 | 0.162191                       | not be rejected                            |
| C    | 2016 | 0.069008                       | 0.01 | 0.159835                       | not be rejected                            |
| C    | 2015 | 0.104069                       | 0.01 | 0.160609                       | not be rejected                            |

|   |      |          |      |          |                 |
|---|------|----------|------|----------|-----------------|
| D | 2019 | 0.199637 | 0.01 | 0.25907  | not be rejected |
| D | 2018 | 0.249059 | 0.01 | 0.25907  | not be rejected |
| D | 2015 | 0.169159 | 0.01 | 0.22119  | not be rejected |
| D | 2016 | 0.249707 | 0.01 | 0.25907  | not be rejected |
| D | 2017 | 0.176462 | 0.01 | 0.25907  | not be rejected |
| E | 2018 | 0.126981 | 0.01 | 0.17087  | not be rejected |
| E | 2017 | 0.141919 | 0.01 | 0.177848 | not be rejected |
| E | 2019 | 0.120622 | 0.01 | 0.169939 | not be rejected |
| E | 2015 | 0.142351 | 0.01 | 0.178916 | not be rejected |
| E | 2016 | 0.106009 | 0.01 | 0.184561 | not be rejected |
| F | 2017 | 0.222757 | 0.01 | 0.086028 | be rejected     |
| F | 2018 | 0.158238 | 0.01 | 0.088529 | be rejected     |
| F | 2019 | 0.117284 | 0.01 | 0.089865 | be rejected     |
| F | 2016 | 0.11734  | 0.01 | 0.099383 | be rejected     |
| F | 2015 | 0.091364 | 0.01 | 0.087252 | be rejected     |
| G | 2018 | 0.075777 | 0.01 | 0.185756 | not be rejected |
| G | 2019 | 0.06534  | 0.01 | 0.186974 | not be rejected |
| G | 2016 | 0.144673 | 0.01 | 0.190777 | not be rejected |
| G | 2017 | 0.080932 | 0.01 | 0.197667 | not be rejected |
| G | 2015 | 0.070522 | 0.01 | 0.194822 | not be rejected |
| H | 2018 | 0.154555 | 0.01 | 0.248573 | not be rejected |
| H | 2019 | 0.108152 | 0.01 | 0.23076  | not be rejected |
| H | 2017 | 0.100226 | 0.01 | 0.200639 | not be rejected |
| I | 2017 | 0.152504 | 0.01 | 0.26931  | not be rejected |
| I | 2018 | 0.136399 | 0.01 | 0.26931  | not be rejected |
| I | 2019 | 0.153308 | 0.01 | 0.37543  | not be rejected |
| I | 2015 | 0.40462  | 0.01 | 0.26931  | be rejected     |
| I | 2016 | 0.413898 | 0.01 | 0.26931  | be rejected     |
| J | 2015 | 0.050766 | 0.01 | 0.164655 | not be rejected |
| J | 2018 | 0.088998 | 0.01 | 0.159072 | not be rejected |
| J | 2016 | 0.065269 | 0.01 | 0.150054 | not be rejected |
| J | 2019 | 0.088111 | 0.01 | 0.164655 | not be rejected |
| J | 2017 | 0.064957 | 0.01 | 0.159835 | not be rejected |
| K | 2019 | 0.051423 | 0.01 | 0.107015 | not be rejected |
| K | 2018 | 0.071735 | 0.01 | 0.106104 | not be rejected |
| K | 2015 | 0.080557 | 0.01 | 0.104998 | not be rejected |
| K | 2017 | 0.077419 | 0.01 | 0.104998 | not be rejected |
| K | 2016 | 0.090121 | 0.01 | 0.10435  | not be rejected |
| L | 2016 | 0.150893 | 0.01 | 0.10435  | be rejected     |
| L | 2015 | 0.109653 | 0.01 | 0.104998 | be rejected     |
| L | 2019 | 0.103964 | 0.01 | 0.104565 | not be rejected |
| L | 2018 | 0.12002  | 0.01 | 0.10588  | be rejected     |
| L | 2017 | 0.106385 | 0.01 | 0.104565 | be rejected     |
| M | 2019 | 0.079521 | 0.01 | 0.210432 | not be rejected |
| M | 2018 | 0.090195 | 0.01 | 0.197667 | not be rejected |
| M | 2016 | 0.121158 | 0.01 | 0.196229 | not be rejected |
| M | 2017 | 0.087496 | 0.01 | 0.192097 | not be rejected |
| M | 2015 | 0.125483 | 0.01 | 0.200639 | not be rejected |
| N | 2019 | 0.082905 | 0.01 | 0.112481 | not be rejected |
| N | 2018 | 0.094505 | 0.01 | 0.110907 | not be rejected |
| N | 2016 | 0.056505 | 0.01 | 0.10435  | not be rejected |

|   |      |          |      |          |                 |
|---|------|----------|------|----------|-----------------|
| N | 2015 | 0.076176 | 0.01 | 0.104998 | not be rejected |
| N | 2017 | 0.074497 | 0.01 | 0.104565 | not be rejected |
| O | 2018 | 0.115327 | 0.01 | 0.106104 | be rejected     |
| O | 2015 | 0.105749 | 0.01 | 0.104565 | be rejected     |
| O | 2016 | 0.09478  | 0.01 | 0.10435  | not be rejected |
| O | 2019 | 0.115778 | 0.01 | 0.104998 | be rejected     |
| O | 2017 | 0.119404 | 0.01 | 0.104998 | be rejected     |
| P | 2015 | 0.07564  | 0.01 | 0.104565 | not be rejected |
| P | 2016 | 0.0637   | 0.01 | 0.104565 | not be rejected |
| P | 2019 | 0.061787 | 0.01 | 0.104998 | not be rejected |
| P | 2017 | 0.070502 | 0.01 | 0.104998 | not be rejected |
| P | 2018 | 0.115494 | 0.01 | 0.10588  | be rejected     |

Table S3. Kolmogorov-Smirnov (K-S) test of TSS for each WWTP in each year.

| WWTP | Year | Kolmogorov-Smirnov<br>computed | Alfa | Table of<br>Kolmogorov-Smirnov | The hypothesized log-<br>normal should ... |
|------|------|--------------------------------|------|--------------------------------|--------------------------------------------|
| A    | 2019 | 0.093899                       | 0.01 | 0.200639                       | not be rejected                            |
| A    | 2015 | 0.111446                       | 0.01 | 0.22604                        | not be rejected                            |
| A    | 2016 | 0.164377                       | 0.01 | 0.202177                       | not be rejected                            |
| A    | 2017 | 0.101287                       | 0.01 | 0.205361                       | not be rejected                            |
| A    | 2018 | 0.108231                       | 0.01 | 0.20375                        | not be rejected                            |
| B    | 2017 | 0.163583                       | 0.01 | 0.157578                       | be rejected                                |
| B    | 2015 | 0.20906                        | 0.01 | 0.159072                       | be rejected                                |
| B    | 2016 | 0.181954                       | 0.01 | 0.161394                       | be rejected                                |
| B    | 2018 | 0.164263                       | 0.01 | 0.159072                       | be rejected                                |
| B    | 2019 | 0.168691                       | 0.01 | 0.157578                       | be rejected                                |
| C    | 2015 | 0.078863                       | 0.01 | 0.160609                       | not be rejected                            |
| C    | 2017 | 0.069838                       | 0.01 | 0.163                          | not be rejected                            |
| C    | 2016 | 0.177915                       | 0.01 | 0.159835                       | be rejected                                |
| D    | 2016 | 0.093871                       | 0.01 | 0.22604                        | not be rejected                            |
| D    | 2017 | 0.078932                       | 0.01 | 0.223898                       | not be rejected                            |
| D    | 2019 | 0.129152                       | 0.01 | 0.26931                        | not be rejected                            |
| D    | 2015 | 0.064991                       | 0.01 | 0.145792                       | not be rejected                            |
| D    | 2018 | 0.139881                       | 0.01 | 0.153338                       | not be rejected                            |
| E    | 2019 | 0.094803                       | 0.01 | 0.17087                        | not be rejected                            |
| E    | 2016 | 0.102695                       | 0.01 | 0.184561                       | not be rejected                            |
| E    | 2018 | 0.06556                        | 0.01 | 0.169939                       | not be rejected                            |
| E    | 2017 | 0.067894                       | 0.01 | 0.178916                       | not be rejected                            |
| E    | 2015 | 0.085723                       | 0.01 | 0.178916                       | not be rejected                            |
| F    | 2018 | 0.211474                       | 0.01 | 0.13776                        | be rejected                                |
| F    | 2019 | 0.162081                       | 0.01 | 0.145792                       | be rejected                                |
| F    | 2017 | 0.197085                       | 0.01 | 0.13221                        | be rejected                                |
| F    | 2016 | 0.186077                       | 0.01 | 0.156847                       | be rejected                                |
| F    | 2015 | 0.124339                       | 0.01 | 0.137271                       | not be rejected                            |
| G    | 2019 | 0.105983                       | 0.01 | 0.186974                       | not be rejected                            |
| G    | 2017 | 0.08655                        | 0.01 | 0.197667                       | not be rejected                            |
| G    | 2018 | 0.084949                       | 0.01 | 0.185756                       | not be rejected                            |
| G    | 2015 | 0.069955                       | 0.01 | 0.194822                       | not be rejected                            |
| G    | 2016 | 0.150665                       | 0.01 | 0.190777                       | not be rejected                            |

|   |      |          |      |          |                 |
|---|------|----------|------|----------|-----------------|
| H | 2019 | 0.144312 | 0.01 | 0.23076  | not be rejected |
| H | 2018 | 0.12122  | 0.01 | 0.248573 | not be rejected |
| H | 2017 | 0.23328  | 0.01 | 0.194822 | be rejected     |
| I | 2016 | 0.249967 | 0.01 | 0.26931  | not be rejected |
| I | 2015 | 0.287946 | 0.01 | 0.26931  | be rejected     |
| I | 2019 | 0.156361 | 0.01 | 0.39122  | not be rejected |
| I | 2018 | 0.268471 | 0.01 | 0.26931  | not be rejected |
| I | 2017 | 0.227942 | 0.01 | 0.26931  | not be rejected |
| J | 2019 | 0.089117 | 0.01 | 0.164655 | not be rejected |
| J | 2017 | 0.091641 | 0.01 | 0.159835 | not be rejected |
| J | 2018 | 0.069204 | 0.01 | 0.159072 | not be rejected |
| J | 2015 | 0.05555  | 0.01 | 0.164655 | not be rejected |
| J | 2016 | 0.055584 | 0.01 | 0.150054 | not be rejected |
| K | 2016 | 0.079524 | 0.01 | 0.10435  | not be rejected |
| K | 2017 | 0.04799  | 0.01 | 0.104998 | not be rejected |
| K | 2018 | 0.048521 | 0.01 | 0.106104 | not be rejected |
| K | 2019 | 0.075296 | 0.01 | 0.108909 | not be rejected |
| K | 2015 | 0.163151 | 0.01 | 0.104998 | be rejected     |
| L | 2016 | 0.249733 | 0.01 | 0.104565 | be rejected     |
| L | 2018 | 0.201204 | 0.01 | 0.10588  | be rejected     |
| L | 2019 | 0.319186 | 0.01 | 0.104565 | be rejected     |
| L | 2015 | 0.284094 | 0.01 | 0.104998 | be rejected     |
| L | 2017 | 0.235562 | 0.01 | 0.104565 | be rejected     |
| M | 2015 | 0.159403 | 0.01 | 0.200639 | not be rejected |
| M | 2017 | 0.100139 | 0.01 | 0.192097 | not be rejected |
| M | 2016 | 0.11082  | 0.01 | 0.196229 | not be rejected |
| M | 2019 | 0.087511 | 0.01 | 0.210432 | not be rejected |
| M | 2018 | 0.066488 | 0.01 | 0.197667 | not be rejected |
| N | 2017 | 0.089017 | 0.01 | 0.104565 | not be rejected |
| N | 2016 | 0.086532 | 0.01 | 0.10435  | not be rejected |
| N | 2018 | 0.087263 | 0.01 | 0.112481 | not be rejected |
| N | 2019 | 0.073907 | 0.01 | 0.112481 | not be rejected |
| N | 2015 | 0.122367 | 0.01 | 0.104998 | be rejected     |
| O | 2017 | 0.119091 | 0.01 | 0.104998 | be rejected     |
| O | 2015 | 0.210783 | 0.01 | 0.104565 | be rejected     |
| O | 2018 | 0.184953 | 0.01 | 0.106104 | be rejected     |
| O | 2016 | 0.142573 | 0.01 | 0.10435  | be rejected     |
| O | 2019 | 0.251629 | 0.01 | 0.104998 | be rejected     |
| P | 2017 | 0.066635 | 0.01 | 0.104998 | not be rejected |
| P | 2015 | 0.079816 | 0.01 | 0.104565 | not be rejected |
| P | 2016 | 0.10055  | 0.01 | 0.104565 | not be rejected |
| P | 2018 | 0.145718 | 0.01 | 0.10588  | be rejected     |
| P | 2019 | 0.153733 | 0.01 | 0.104998 | be rejected     |

**Table S4.** Welch F tests of the two AS clusters, CAS-WWTPs and EA-WWTPs, for reliability and stability.

| Welch F test     | Reliability           | Stability |
|------------------|-----------------------|-----------|
| BOD <sub>5</sub> | $1.59 \times 10^{-5}$ | 0.002     |
| COD              | 0.011                 | 0.030     |
| TSS              | 0.100                 | 0.138     |
